# Supplementary material
Source: publisher site journal article supplement (https://www.dovepress.com/article/356373)
Supplement: Supplementary file 1 [file get_supplementary_file.php]

**Table S1: Comparison of 17 features between training set and testing set**

|  | Training set | Testing set | P-value |
| --- | --- | --- | --- |
|  | n=346 | n=149 |  |
| Age (years) | 58.0 ± 10. 1 | 58.8 ± 10.8 | 0.421 |
| BMI (kg/m2) | 24.3 ± 2.8 | 24.5 ± 3.3 | 0.376 |
| SBP (mmHg) | 151 ± 23 | 151 ± 23 | 0.831 |
| FBG (mmol/L) | 5. 7 ± 1.9 | 5.6 ± 1.6 | 0.779 |
| Years of hypertension (years) | 0.5 (0.0-4.0) | 1.0 (0.0-5.0) | 0.241 |
| NIHSS score | 0 (0-0) | 0 (0-0) | 0.886 |
| mRS score | 0 (0-1) | 0 (0-1) | 0.078 |
| MRI ﬁndings |  |  |  |
| Number of lesions | 7.0 (4.0-12.0) | 8.0 (4.0-13.0) | 0.240 |
| Maximum lesion diameter (mm) | 0.5 (0.1-1.0) | 0.5 (0.1-1.1) | 0.704 |
| MRI infarct area | 5.0 ± 2.5 | 4.9 ± 2.5 | 0.602 |
| Diabetes | 24 (6.9%) | 13 (8.7%) | 0.488 |
| Hyperlipidemia | 212 (61.3%) | 89 (59.7%) | 0.747 |
| Metabolic syndrome | 150 (43.4%) | 61 (40.9%) | 0.619 |
| Location of MIS |  |  |  |
| ACA | 194 (56.1%) | 93 (62.4%) | 0.189 |
| PCA | 14 (4.1%) | 2 (1.3%) | 0.119 |
| Abdominal obesity | 79 (22.8%) | 33 (22.2%) | 0.867 |
| Elevated TG level | 200 (57.8%) | 77 (51.7%) | 0.208 |

The data in the table were expressed as Mean ± SD / Median (Q1-Q3) / N (%)

Abbreviations: SVE, subsequent vascular events; BMI, body mass index; SBP, systolic blood pressure; DBP, diastolic blood pressure; FBG, fasting blood glucose; NIHSS, National Institutes of Health Stroke Scale; MIS, minor ischemic stroke; ACA, anterior circulation artery; PCA, posterior cerebral artery; TG, triglycerides.


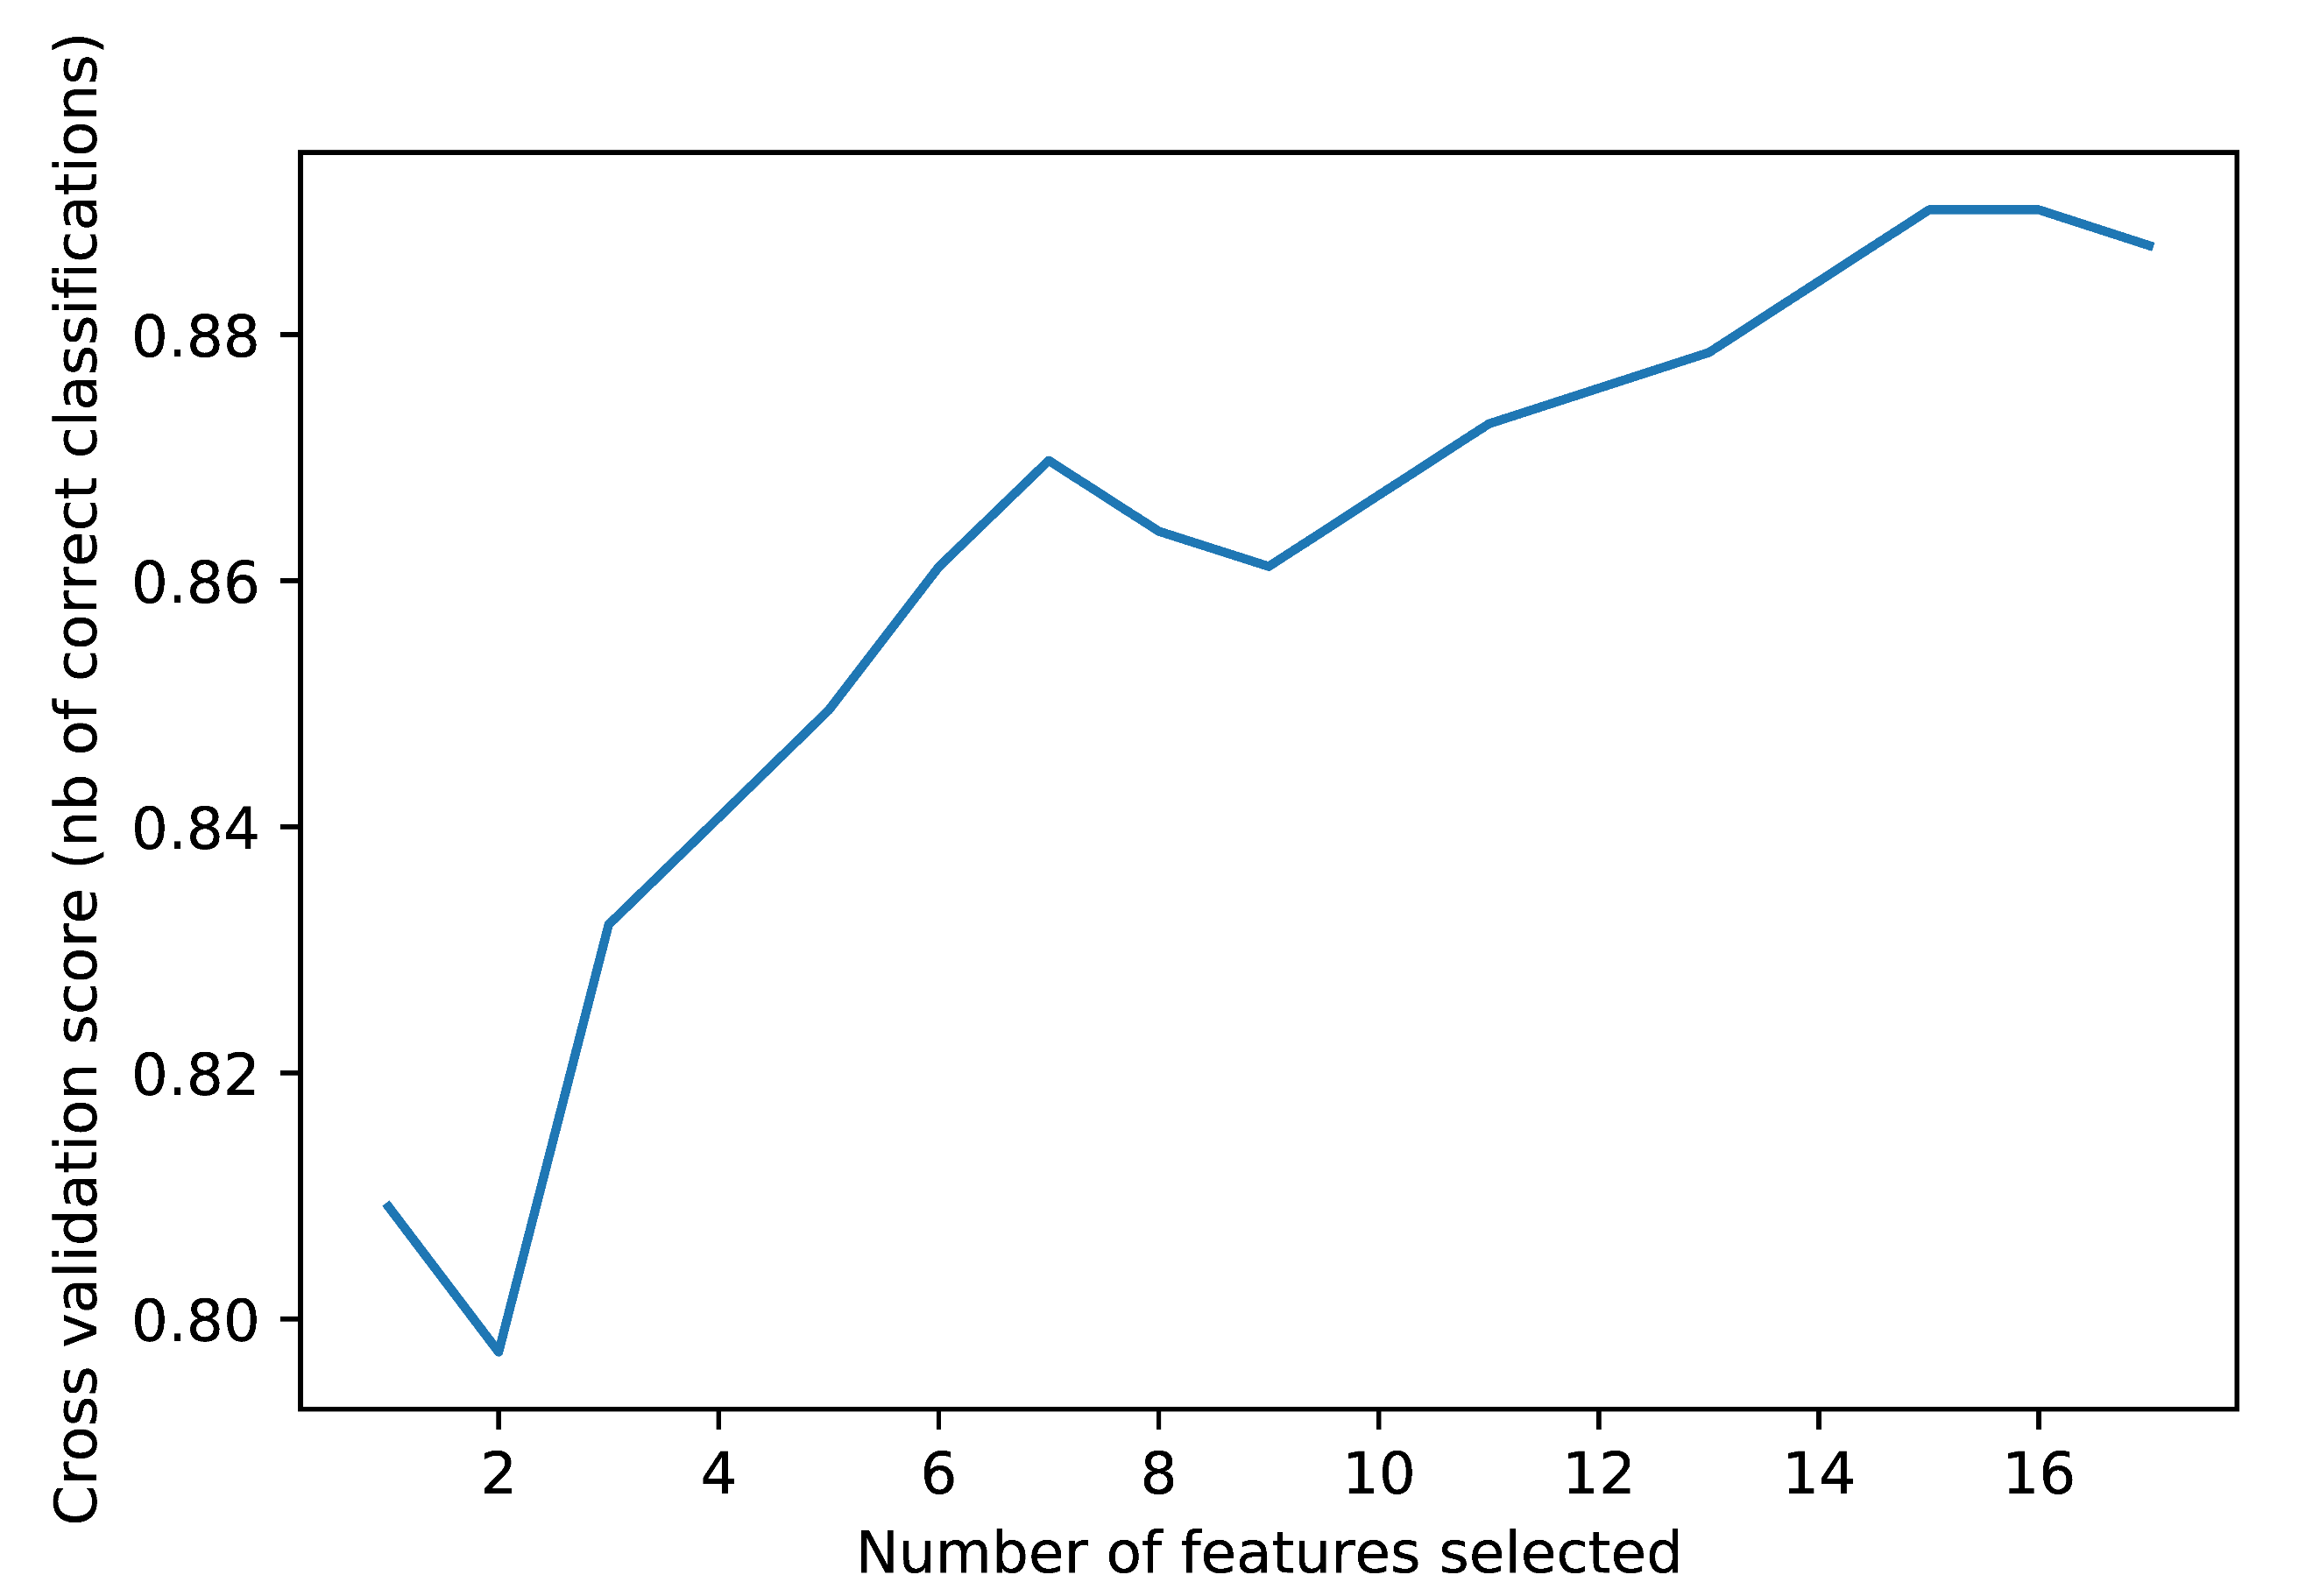


**Figure S1: Learning curve of feature numbers**

parameters: estimator=LogisticRegression (penalty="l2", solver="liblinear", max_iter=1000, class_weight="balanced"), step=1, scoring='accuracy', cv=StratifiedKFold (n_splits=5, shuffle=True)

**LR modeling (parameters: penalty="l2", solver="liblinear", max_iter=1000, class_weight="balanced")**

**SVM modeling (parameters: C=2.347, gamma="auto", kernel="poly", class_weight="balanced")**
